# Supplementary material
Source: publisher site journal article supplement (https://www.dovepress.com/article/304494)
Supplement: Supplementary file 1 [file get_supplementary_file.php]

# Supplemental figure 1

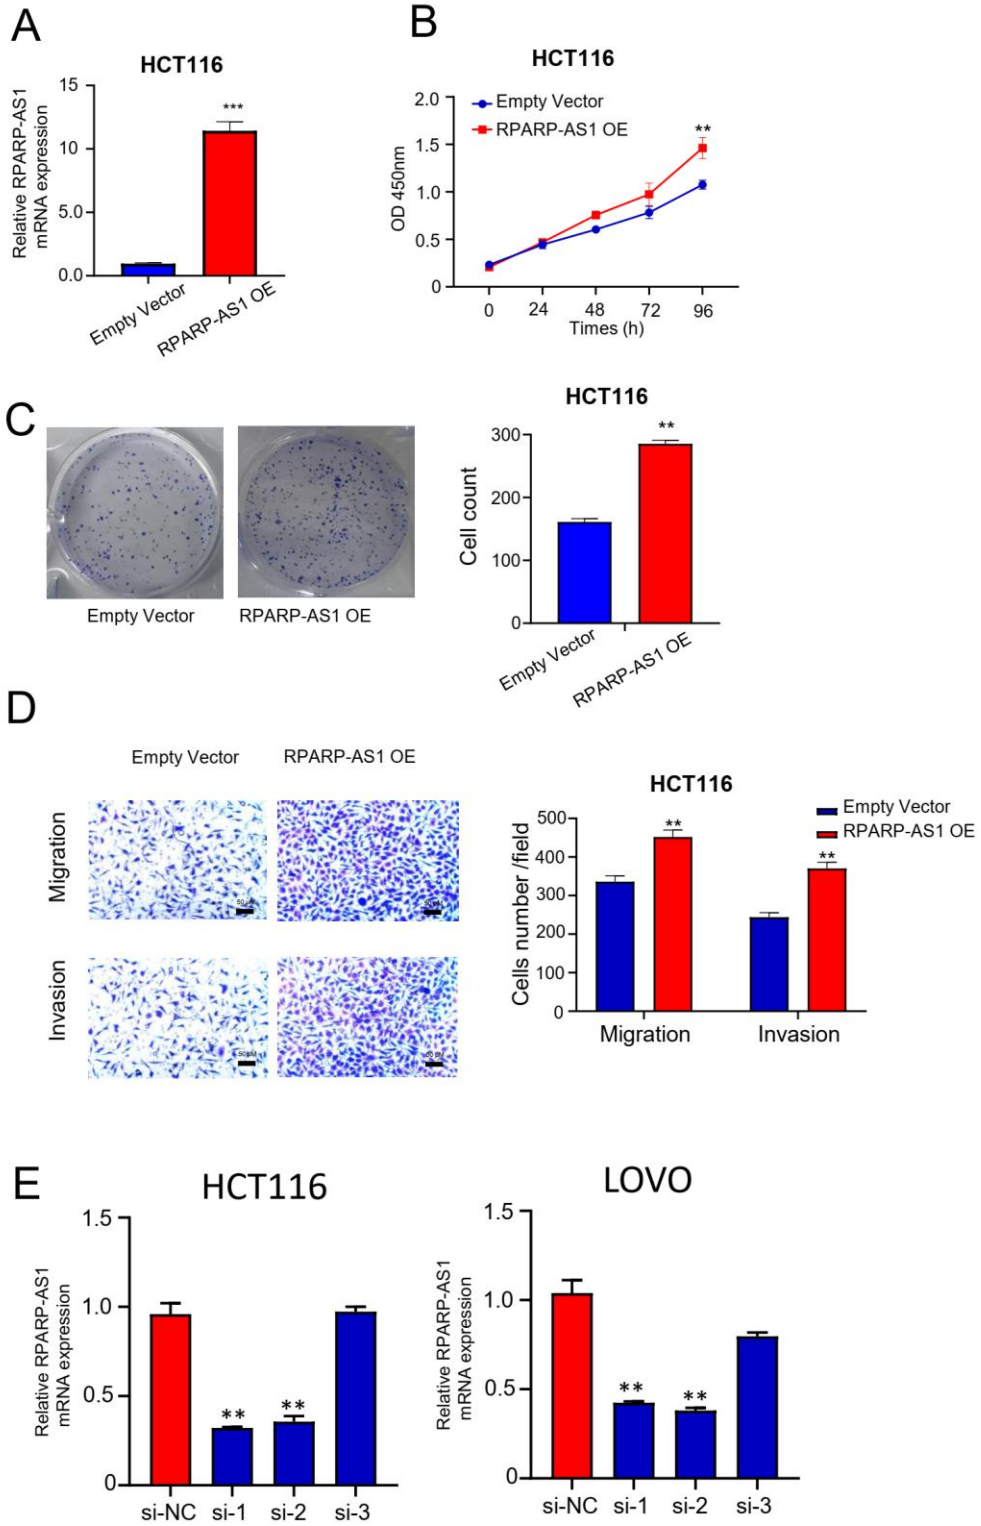

Legend of supplementary Figure 1

Supplementary Figure 1 (A) RPARP-AS1 was over-expressed in HCT116 cells to research its The biological function. RPARP-AS1 over-expression promoted the proliferation by CCK8 (B) and colony-formation experiment (C), and invasion (D) in HCT116 cells. E: The knockout ability of three siRNAs targeting RPARP-AS1. (\*\*P-value < 0.01; \*\*\*P-value < 0.001)
